# Supplementary material for: Nutrient limitation suppresses the temperature dependence of phytoplankton metabolic rates
Source: ISME J. 2018 Apr 25;12(7):1836–45. doi: 10.1038/s41396-018-0105-1 (PMC6018665; doi:10.1038/s41396-018-0105-1)
Supplement: Supplementary file 2 — Dataset 1 [file 41396_2018_105_MOESM2_ESM.xlsx]

## Sheet: Hoja1
ORIGINAL DATA: Nutrient limitation suppresses the temperature dependence of phytoplankton metabolic rates E. Marañón (em@uvigo.es), M. P. Lorenzo, P. Cermeño, B. Mouriño-Carballido
Species	Dilution rate (d-1)	Temperature (°C)	POC (ugC/mL)	SD	pgC/cell or fgC/cell	SD	pgChl/cell or fgChl/cell	SD	C:N ratio (at:at)	SD	C:Chla (g:g)	SD	C-specific C fixation (h-1)	SD	Chl-specific C fixation (ugC/ugChla h)	SD	C-specific respiration (h-1)	SD
Skeletonema costatum	0.14	8	36.4925	0.085572	21.4662	0.0503365	0.302564	0.0120546	17.0301	1.03788	70.9476	2.83155	0.0152454	3.66543e-05	1.08163	0.0430975
Skeletonema costatum	0.14	12	31.6079	1.91078	15.804	0.95539	0.284629	0.00158278	18.1641	0.897598	55.5248	3.37079	0.0216482	0.0013892	1.20201	0.0267268	0.00344862	0.000410079
Skeletonema costatum	0.14	16	28.8455	2.06297	12.5415	0.896942	0.316653	0.0193411	15.4755	0.429163	39.6065	3.72502	0.0286767	0.00206146	1.13579	0.0698627	0.00387433	0.000323631
Skeletonema costatum	0.14	20	24.5168	0.620419	20.4307	0.517016	0.447482	0.0167997	11.7546	0.601137	45.657	2.06713	0.0270345	0.000900655	1.23431	0.0535038	0.00400246	0.000192059
Skeletonema costatum	0.35	8	23.356	1.17312	12.2927	0.617431	0.992035	0.00208699	9.71948	0.715141	12.3914	0.622934	0.064609	0.00340408	0.800593	0.0128487	0.00398281	0.000400208
Skeletonema costatum	0.35	12	19.2528	1.56403	8.37078	0.680013	0.759772	0.010547	8.2143	0.255441	11.0175	0.907997	0.0395667	0.00474366	0.435926	0.0389099	0.00490366	0.000547824
Skeletonema costatum	0.35	16	18.258		6.29588	0	0.77883	0.0271055	7.24856		8.08376	0.281338	0.0969576	0.00409613	0.783782	0.042901	0.006073	0.000606971
Skeletonema costatum	0.35	20	20.7287	2.02449	6.47771	0.632654	0.583196	0.0212842	6.56247	0.415787	11.1073	1.15807	0.0315137	0.00415325	0.350031	0.0335051	0.00645326	0.000672275
Skeletonema costatum	0.6	8	3.95233	0.131353	18.8206	0.625493	1.17866	0.0856844	7.6668		15.9678	1.27635	0.0719075	0.00863057	1.1482	0.156534	0.0100221	0.00479296
Skeletonema costatum	0.6	12	14.773	1.0906	11.3639	0.838921	1.08721	0.0315275	5.53855	0.130168	10.4524	0.829028	0.070384	0.00568405	0.735681	0.0321756	0.00782965	0.000986745
Skeletonema costatum	0.6	16	14.1103	0.143751	7.83907	0.0798618	1.09812	0.01157	6.24535	0.755222	7.13863	0.104624	0.0612362	0.00232995	0.437143	0.0166741	0.00929934	0.00038323
Skeletonema costatum	0.6	20	14.1976	0.734069	7.47243	0.386352	1.17876	0.0402666	5.66259	0.0780479	6.33925	0.392839	0.103176	0.00615383	0.654059	0.0296214	0.00777027	0.000482401
Emiliania huxleyi	0.088	10	1.36		8	0			7.55682	0.683965			0.0400353	0.00102213
Emiliania huxleyi	0.088	14	4.1895	0.322441	8.58504	0.660739	0.0760454	0.00444672	9.82051	0.636468	112.894	10.9121	0.0388302	0.00332071	4.38368	0.304004	0.00910489	0.00146411
Emiliania huxleyi	0.088	18	5.814	0.927017	7.77273	1.23933	0.0780255	0.00743316	10.503	0.621268	99.6178	18.5028	0.0432035	0.00702879	4.30384	0.432975	0.00871419	0.00140469
Emiliania huxleyi	0.088	22	4.1325	0.0806102	9.12252	0.177947	0.137679	0.00154525	12.2233	1.92569	66.2593	1.49116	0.0407166	0.00299898	2.69786	0.193993	0.0116592	0.00140641
Emiliania huxleyi	0.34	10	2.85	0.362746	4.4186	0.562397	0.125043	0.000155039	11.229	1.23602	35.3367	4.49784					0.0231798	0.00514746
Emiliania huxleyi	0.34	14	4.332	0.523966	3.20889	0.388123	0.0900767	0.000318519	6.73867	0.815058	35.624	4.31065	0.190929	0.0243695	6.80165	0.277245	0.0163126	0.00294577
Emiliania huxleyi	0.34	18	4.275	0.846407	2.27394	0.450216	0.0765389	0.000478723	7.68982	0.153892	29.7095	5.88512	0.161381	0.0336257	4.79455	0.311273	0.0167083	0.00413286
Emiliania huxleyi	0.34	22	4.503	0.201525	2.37	0.106066	0.114648	0.0187895	7.00467	0.313484	20.672	3.51196	0.195302	0.0123396	4.03728	0.180061	0.0180444	0.00182787
Emiliania huxleyi	0.6	10	2.9355	0.0806102	4.31691	0.118544	0.215523	0.00392647	9.785	0.268701	20.0299	0.660072					0.0133696	0.00219144
Emiliania huxleyi	0.6	14	2.8785	0.16122	4.23309	0.237089	0.416562	0.00783824	7.46278	0.417979	10.162	0.600417	0.156434	0.0103834	1.58968	0.0566231	0.0214153	0.00240738
Emiliania huxleyi	0.6	18	3.5055	0.16122	3.33857	0.153543	0.239121	0.0199333	8.23525	0.78846	13.9619	1.32925	0.253657	0.0117326	3.54152	0.0174494	0.0182906	0.001513
Emiliania huxleyi	0.6	22	3.819	0.0403051	3.10488	0.0327684	0.235639	0.00111382	7.47311	0.802344	13.1764	0.152372	0.197571	0.0477493	2.60328	0.628565	0.0179762	0.000890279
Synechococcus sp.	0.1	18	6.68547	0.486875	147.977	10.7765	0.687367	0.112107	10.3593	0.39149	215.28	38.4526					0.00385645	0.000516617
Synechococcus sp.	0.1	22	4.63396	0.160961	93.4003	3.24426	0.446887	0.0557444	7.49851	0.447192	209.002	27.0627	0.0140073	0.000510163	2.92755	0.366586	0.00309737	0.000341582
Synechococcus sp.	0.1	26	6.76749	0.521784	125.211	9.65395	0.680066	0.00616512	10.542	0.542572	184.116	14.2934	0.014303	0.00121678	2.6334	0.0976405	0.00329866	0.000579485
Synechococcus sp.	0.1	30	6.25445	0.265091	142.675	6.0472	1.0422	0.0402868	11.4914	3.65503	136.899	7.85313	0.0188339	0.000922141	2.57833	0.118016
Synechococcus sp.	0.3	18	7.85573	0.427008	76.3309	4.14906	0.568006	0.00744679	7.61197	1.11507	134.384	7.51407	0.0246116	0.00166622	3.30741	0.140347	0.00452931	0.00104994
Synechococcus sp.	0.3	22	9.67826	0.710434	82.442	6.05166	0.8231	0.0400218	11.0801	0.426712	100.16	8.81896	0.0245266	0.00180957	2.45659	0.120833	0.00423309	0.000522377
Synechococcus sp.	0.3	26	11.5844	0.141039	87.8449	1.06951	1.33915	0.26961	12.1594	0.112806	65.5977	13.2309	0.0303884	0.000489669	1.99341	0.401884	0.00415073	0.000467388
Synechococcus sp.	0.3	30	14.3125	0.462699	106.697	3.44934	2.07303	0.196739	13.3625	1.03236	51.4691	5.16025	0.0266738	0.000863257	1.37287	0.130308	0.00415494	0.000289422
